# Supplementary material
Source: PubMed Central journal article supplement (PMC2830854)
Supplement: NIHMS163449-supplement-01.pdf [file NIHMS163449-supplement-01.pdf]

## Optimization of Time-Resolved Fluorescence Assay for Detection of Eu-DOTA-labeled Ligand-Receptor Interactions

Channa R. De Silva<sup>a</sup>, Josef Vagner<sup>b</sup>, Ronald Lynch<sup>b,c</sup>, Robert J. Gillies<sup>d</sup>, and Victor J. Hruby<sup>a,b\*</sup>

<sup>a</sup>*Department of Chemistry, University of Arizona, Tucson, AZ 85721*

<sup>b</sup>*Bio5 Institute, University of Arizona, Tucson, AZ 85719*

<sup>c</sup>*Department of Physiology, University of Arizona, Tucson, AZ 85719*

<sup>d</sup>*H. Lee Moffitt Center & Research Institute, Tampa, FL, 33612*

### Supporting information

#### *QC and ligand purification*

The purity of the products was checked by analytical PR-HPLC using a Waters Alliance 2695 Separation Model with a Waters 2487 dual wavelength detector (220 and 280 nm) on a reverse phase column (Waters Symmetry C18, 4.6 × 75 mm, 3.5 μm). Peptides were eluted with a linear gradient of aqueous CH<sub>3</sub>CN/0.1% TFA at a flow rate of 0.3 mL/min. Purification of ligands was achieved on a Waters 600 HPLC using a reverse phase column (Vydac C18, 15–20 μm, 22 × 250 mm). Peptides were eluted with a linear gradient of CH<sub>3</sub>CN/0.1% TFA at a flow rate of 5.0 mL/min. Separation was monitored at 230 and 280 nm. Size exclusion chromatography was performed on a borosilicate glass column (2.6 × 250 mm, Sigma, St. Louis, MO) filled with medium sized Sephadex G-25 or G-10. The compounds were eluted with an isocratic flow of 1.0 M aqueous acetic acid. The pure compounds were dissolved in DI water or DMSO at approximately 1-5 mM concentrations. The accurate concentration was determined by HPLC at 280 nm. A solution of D-Trp (0.5 mM) in water or DMSO, accordingly, was co-injected as an internal standard. Structures were characterized by ESI (Finnigan,

Thermoquest LCQ ion trap instrument) or MALDI-TOF (Bruker Reflex-III,  $\alpha$ -cyanocinnamic acid as a matrix) mass spectrometry. For internal calibration an appropriate mixture of standard peptides was used with an average resolution of 8,000–9,000. High resolution mass measurements were carried out on a FT-ICR IonSpec 4.7T instrument.

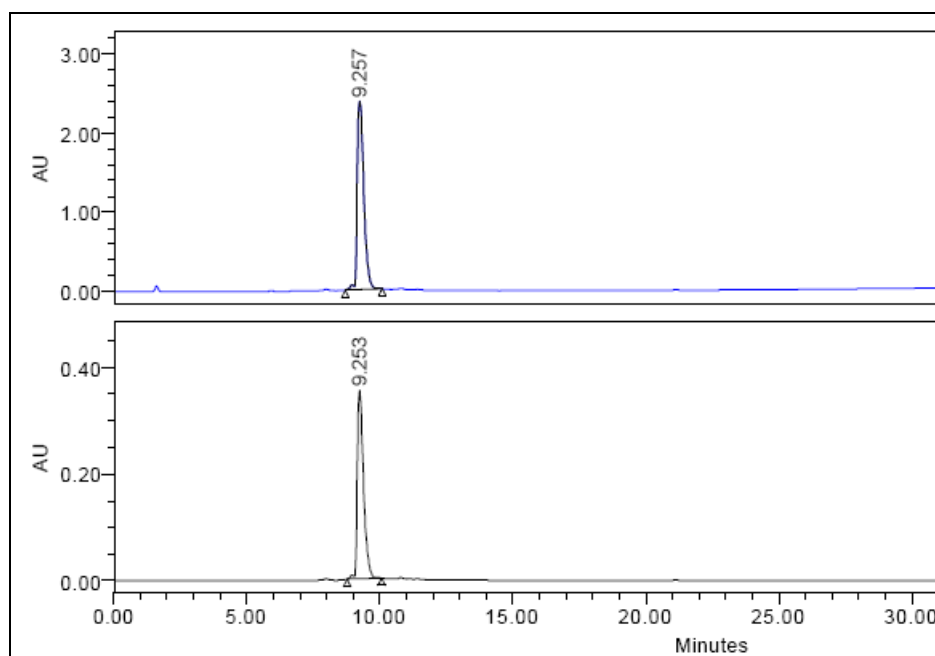

Fig. S1. HPLC profile of purified Eu(III)-DOTA-PEG9-NDP- $\alpha$ -MSH

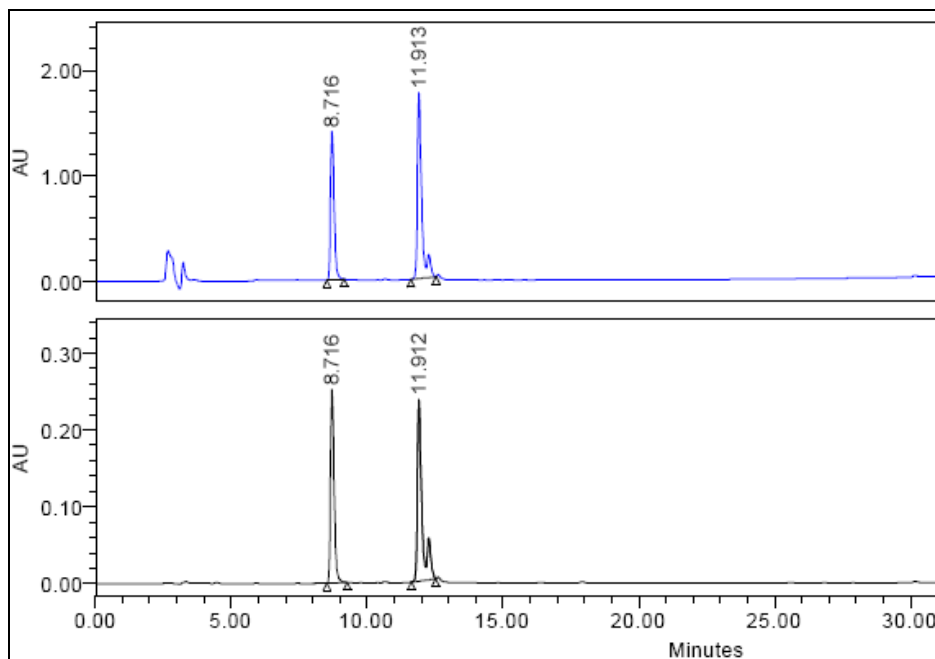

Fig. S2. HPLC profile of purified Eu(III)-DTPA-PEG9-NDP- $\alpha$ -MSH ( $R_t=11.9$  min) and Trp standard (0.5 mM;  $R_t=8.7$  min).

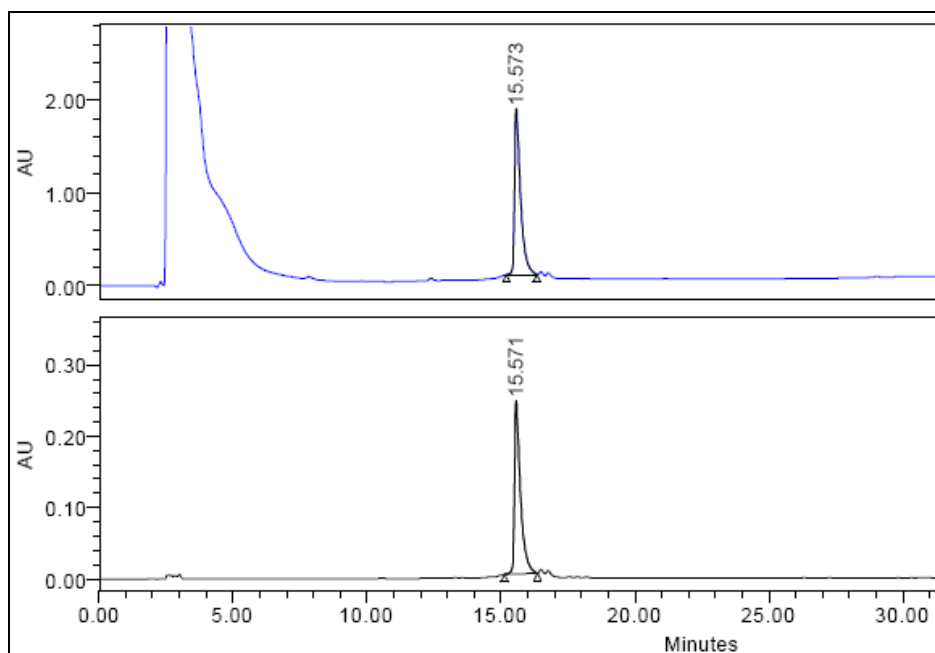

Fig. S3. HPLC profile of purified MSH(7)-PEGO-[ProGly]<sub>6</sub>-Lys[PEG9-Eu(III)-DOTA]-PEGO-CCK(6).

Table S1. Summary of analytical data for the peptides

| Peptide                                                               | Retention time $R_t$ (min) | m/z (FT-ICR) |                             |
|-----------------------------------------------------------------------|----------------------------|--------------|-----------------------------|
|                                                                       |                            | Calculated   | Observed                    |
| Eu(III)-DOTA-PEG9- NDP- $\alpha$ -MSH                                 | 9.2                        | 762.66       | 762.66 (M+3) <sup>3+</sup>  |
| Eu(III)-DTPA-PEG9- NDP- $\alpha$ -MSH                                 | 11.9                       | 758.98       | 758.98 (M+3) <sup>3+</sup>  |
| MSH(7)-PEGO-[ProGly] <sub>6</sub> -Lys[PEG9-Eu(III)-DOTA]-PEGO-CCK(6) | 15.5                       | 1030.24      | 1030.24 (M+4) <sup>4+</sup> |

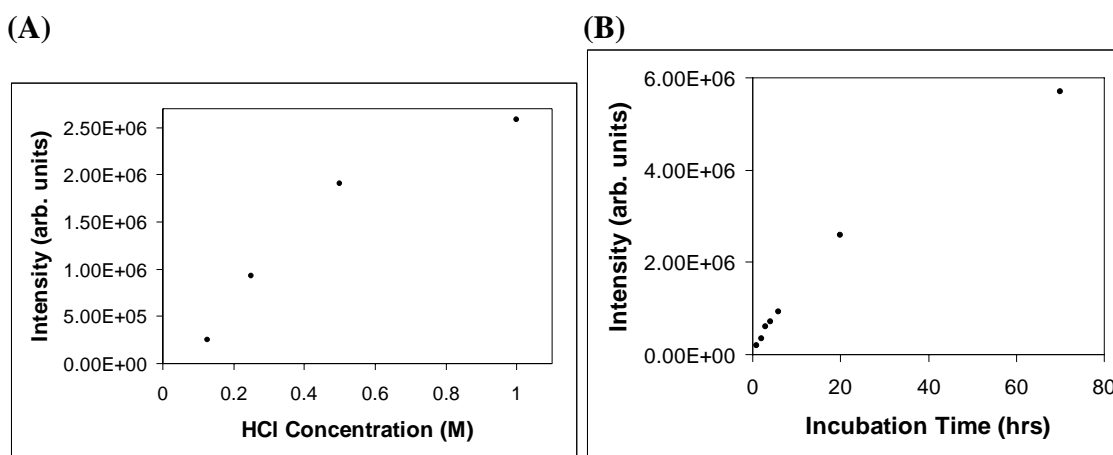

Fig. S4. Eu(III) ion release kinetics of Eu(III)-DOTA-PEG9-NDP- $\alpha$ -MSH. (A) HCl acid strength dependency and (B) incubation time dependency using 1.0 M HCl.

Table S2. Assessment of ligand-receptor binding DELFIA assay quality

| Assay               | Compound       | S:N  | Z'-factor |
|---------------------|----------------|------|-----------|
| Saturation binding  | Eu(III)-DOTA-L | 7.5  | 0.6       |
|                     | Eu(III)-DTPA-L | 6    | 0.5       |
| Competitive binding | Eu(III)-DOTA-L | 15.4 | 0.79      |
|                     | Eu(III)-DTPA-L | 8.9  | 0.64      |

S:N and Z'-factor were calculated near the  $K_d$  values of the saturation binding assays.

(A)

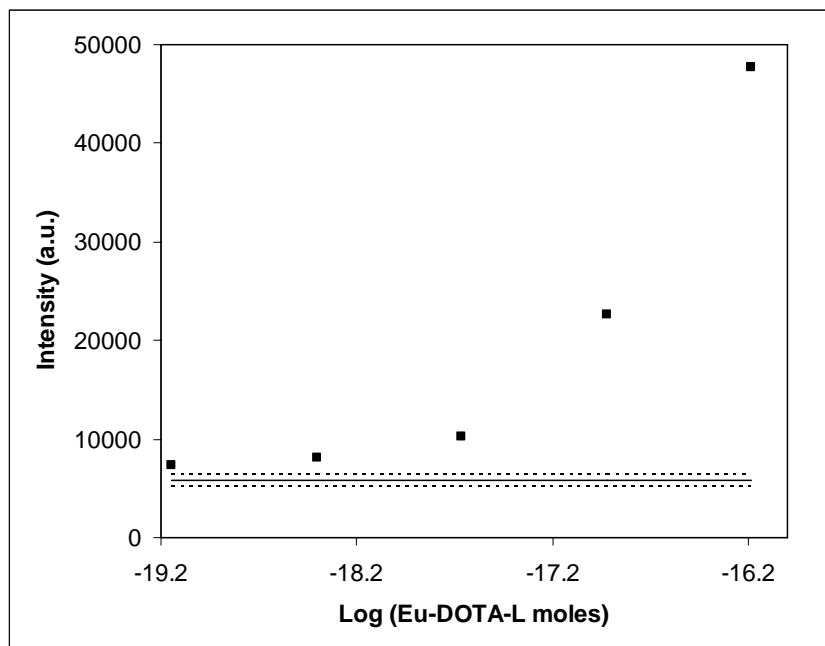

(B)

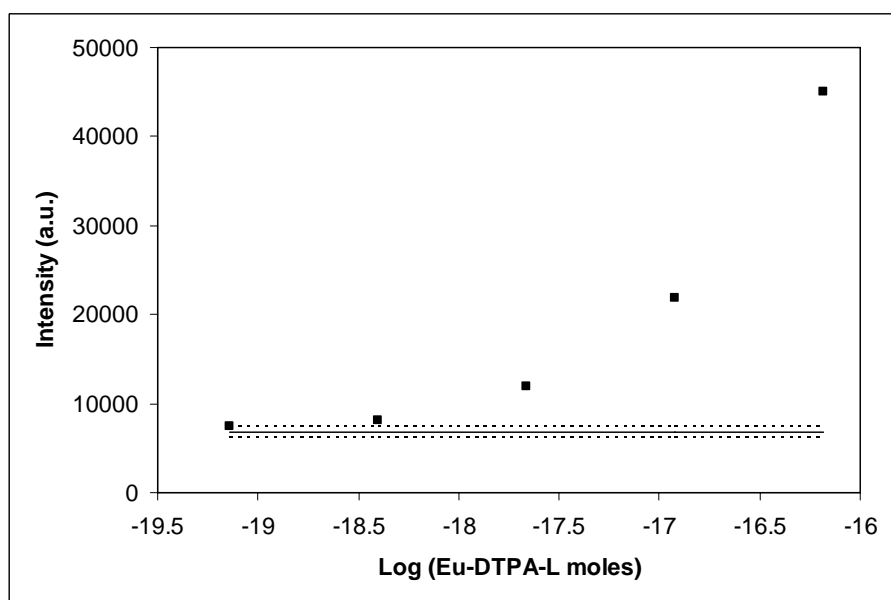

Fig S5. Detection limit of (A) Eu(III)-DOTA-L using modified DELFIA and (B) Eu(III)-DTPA-L using traditional DELFIA (L = PEG9-NDP- $\alpha$ -MSH). Serial dilutions of ligands were prepared in dH<sub>2</sub>O. The background luminescence (solid line) was determined by

averaging 12 background samples. The dotted lines represent the standard error of the background.

Table S3. Evaluation of signal-to-noise ratio (S:N) of Eu(III)-labeled ligands using DELFIA ((L = PEG9-NDP- $\alpha$ -MSH)

| Concentration<br>(moles/well) | S:N<br>(Eu-DOTA-L) | S:N<br>(Eu-DTPA-L) |
|-------------------------------|--------------------|--------------------|
| $3.61 \times 10^{-16}$        | 36                 | 37                 |
| $3.61 \times 10^{-17}$        | 18                 | 20                 |
| $3.61 \times 10^{-17}$        | 3                  | 6                  |
| $3.61 \times 10^{-18}$        | 1.7                | 1.4                |
| $3.61 \times 10^{-19}$        | 0.8                | 0.45               |
